# Supplementary material for: Association of the medical therapy with beta-blockers or inhibitors of renin-angiotensin system with clinical outcomes in patients with mildly reduced left ventricular ejection fraction after acute myocardial infarction
Source: PubMed Central journal article supplement — Medicine (Baltimore). 2022 Oct 21;101(42):e30846. doi: 10.1097/MD.0000000000030846 (PMC9592534; doi:10.1097/md.0000000000030846), 2022-10-21

Figure S1. Adjusted hazard ratios of 2-year events according to left ventricular ejection fraction  $\leq 45\%$  vs.  $>45\%$  in the propensity score-matched cohort with or without beta-blockers at discharge. CI, confidence interval; LVEF, left ventricular ejection fraction; MACCE, major adverse cardiac and cerebrovascular event; MACE, major adverse cardiac event.

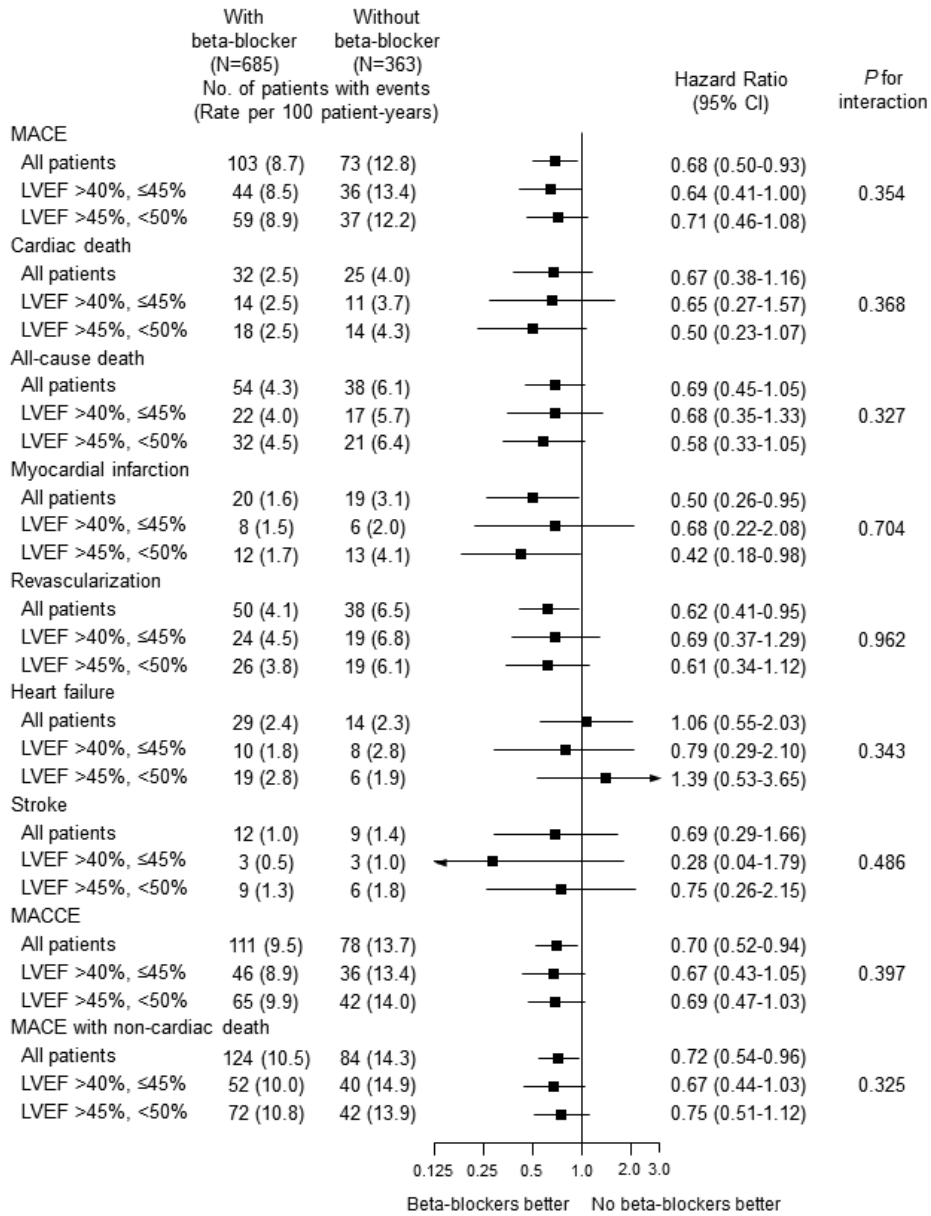

Supplement: medi-101-e30846-s001.pdf [file medi-101-e30846-s001.pdf]
